1       **Title: Proteomic fingerprint identification of Neotropical hard tick species (*Acari:***  
2                   ***Ixodidae*) using a self-curated mass spectra reference library**

3       Short Title: Fingerprinting of Neotropical hard ticks using a self-curated mass spectra library

4       **Authors:**

5       Rolando A. Gittens <sup>1,2</sup>, Alejandro Almanza <sup>1</sup>, Eric Álvarez <sup>1</sup>, Kelly L. Bennett <sup>1,3</sup>, Luis C. Mejía  
6       <sup>1,3</sup>, Javier E. Sanchez-Galan <sup>1,4</sup>, Fernando Merchan <sup>5</sup>, Jonathan Kern <sup>5,6</sup>, Matthew J. Miller <sup>7</sup>,  
7       Helen J. Esser <sup>8</sup>, Robert Hwang <sup>9</sup>, May Dong <sup>9</sup>, Luis F. De León <sup>1,10</sup>, Jose R. Loaiza <sup>1,3,11\*</sup>

8       **Author Affiliations:**

9       <sup>1</sup> Centro de Biodiversidad y Descubrimiento de Drogas, Instituto de Investigaciones Científicas y Servicios de Alta  
10       Tecnología (INDICASAT AIP), Panama, Republic of Panama.

11       <sup>2</sup> Centro de Neurociencias, INDICASAT AIP, Panama, Republic of Panama.

12       <sup>3</sup> Smithsonian Tropical Research Institute, Panama, Republic of Panama.

13       <sup>4</sup> Grupo de Investigación en Biotecnología, Bioinformática y Biología de Sistemas, Facultad de Ingeniería de  
14       Sistemas Computacionales, Universidad Tecnológica de Panamá, Panama, Republic of Panama.

15       <sup>5</sup> Grupo de Investigación en Sistemas de Comunicaciones Digitales Avanzados, Facultad de Ingeniería Eléctrica,  
16       Universidad Tecnológica de Panamá, Panama, Republic of Panama.

17       <sup>6</sup> ENSEIRB-MATMECA – Bordeaux INP, France.

18       <sup>7</sup> Sam Noble Oklahoma Museum of Natural History and Department of Biology, University of Oklahoma, Norman,  
19       OK, USA.

20       <sup>8</sup> Department of Environmental Sciences, Wageningen University, Wageningen, the Netherlands

21       <sup>9</sup> Department of Biology, Swarthmore College, Swarthmore, PA, USA.

22       <sup>10</sup> Department of Biology, University of Massachusetts Boston. Boston, MA, USA.

23       <sup>11</sup> Programa Centroamericano de Maestría en Entomología, Universidad de Panamá, Panama, Republic of  
24       Panama.

25       \*Corresponding author

26       Email: [jloaiza@indicasat.org.pa](mailto:jloaiza@indicasat.org.pa) (JRL)

27 **Abstract (219 words)**

28 Matrix-assisted laser desorption/ionization (MALDI) time-of-flight mass spectrometry is  
29 an analytical method that detects macromolecules that can be used as biomarkers for  
30 taxonomic identification in arthropods. The conventional MALDI approach uses fresh  
31 laboratory-reared arthropod specimens to build a reference mass spectra library with high-  
32 quality standards required to achieve reliable identification. However, this may not be possible  
33 to accomplish in some arthropod groups that are difficult to rear under laboratory conditions, or  
34 for which only alcohol preserved samples are available. Here, we generated MALDI mass  
35 spectra of highly abundant proteins from the legs of 18 Neotropical species of adult field-  
36 collected hard ticks, several of which had not been analyzed by mass spectrometry before. We  
37 then used their mass spectra as fingerprints to identify each tick species by applying machine  
38 learning and pattern recognition algorithms that combined unsupervised and supervised  
39 clustering approaches. Both principal component analysis (PCA) and linear discriminant  
40 analysis (LDA) classification algorithms were able to identify spectra from different tick species,  
41 with LDA achieving the best performance when applied to field-collected specimens that did  
42 have an existing entry in a reference library of arthropod protein spectra. These findings  
43 contribute to the growing literature that ascertains mass spectrometry as a rapid and effective  
44 method for taxonomic identification of disease vectors, which is the first step to predict and  
45 manage arthropod-borne pathogens.

46

47

48 **Author Summary (153 words)**

49           Hard ticks (Ixodidae) are external parasites that feed on the blood of almost every  
50 species of terrestrial vertebrate on earth, including humans. Due to a complete dependency on  
51 blood, both sexes and even immature stages, are capable of transmitting disease agents to  
52 their hosts, causing distress and sometimes death. Despite the public health significance of  
53 ixodid ticks, accurate species identification remains problematic. Vector species identification  
54 is core to developing effective vector control schemes. Herein, we provide the first report of  
55 MALDI identification of several species of field-collected Neotropical tick specimens preserved  
56 in ethanol for up to four years. Our methodology shows that identification does not depend on  
57 a commercial reference library of lab-reared samples, but with the help of machine learning it  
58 can rely on a self-curated reference library. In addition, our approach offers greater accuracy  
59 and lower cost per sample than conventional and modern identification approaches such as  
60 morphology and molecular barcoding.

61

62

63 **Text Word Count: 3,950**

## 64 **Introduction**

65           Hard ticks (Ixodidae) are hematophagous ectoparasites that feed on almost every  
66 species of terrestrial vertebrate on earth, including *Homo sapiens sapiens* [1, 2]. Due to a  
67 complete dependency on blood as a food source, both sexes of adults and immature ticks are  
68 capable of transmitting disease pathogens to their hosts, causing significant morbidity and  
69 sometimes even death [3, 4]. Research on hard ticks has increased recently in the Neotropics,  
70 where a growing number of outbreaks of tick-borne related illnesses have been documented  
71 [5-8]. Despite these efforts, comprehensive studies about the ecology, behavior and control of  
72 hard ticks relevant to public health remain elusive in Central America due to the shortcomings  
73 of traditional taxonomic methods to species identification. Taxonomic identification of  
74 Neotropical Ixodidae has traditionally relied on adult morphological characters [9]; however,  
75 morphological keys for immature stages (i.e., larvae and nymphs) are lacking and experts are  
76 often unable to reliably identify immature ticks to species [9, 10]. Moreover, morphological  
77 identification of ticks is unrealistic in epidemiological settings because assessing the role of  
78 ticks as disease vectors usually involves identifying hundreds of individuals for pathogen  
79 screening, an extremely time-consuming effort, which may be further impeded by the lack of  
80 qualified taxonomic specialists [11].

81           Matrix-assisted laser desorption/ionization (MALDI) time-of-flight mass spectrometry is  
82 an analytical technique that allows for sensitive and accurate detection of complex molecules  
83 such as proteins, peptides, lipids and nucleic acids [12-14]. The conventional MALDI approach  
84 has been used successfully to generate markers for proteomic identification of microorganisms  
85 such as pathogenic bacteria and fungi, which can be cultured in the laboratory and form  
86 discrete colonies with very consistent mass spectra that facilitates the development of

87 reference libraries for identification of unknown samples [15, 16]. In fact, a commercial  
88 program offered by the manufacturers of the MALDI technology is capable of determining  
89 statistical similarities between the spectra of unknown samples and a well-curated, proprietary  
90 reference library of bacteria and fungi to identify the species of the unknown specimen. This is  
91 analogous to the process of matching fingerprints, and offers a simplified comparison score  
92 that ranges from 0.0 to 3.0. Scores above or equal to 2.3 represent a confident match at the  
93 genus rank, and high probability at the species level, while values below 1.7 are considered as  
94 non-reliable identifications [15-17].

95         Although more challenging than identifying bacteria and fungi due to the size and  
96 heterogeneity of the specimen, MALDI has also been used to discriminate among species of  
97 invertebrates, including mosquitoes (*Culicidae* - *Anopheles*), fleas (*Pulicidae* -  
98 *Ctenocephalide*), biting midges (*Ceratopogonidae* - *Culicoides*), sandflies (*Psychodidae* -  
99 *Phlebotomus*, *Lutzomyia*) and ticks (*Ixodidae* - *Rhipicephalus*) [18-26]. A key finding from  
100 these studies is that protein spectra obtained from body sections or whole specimens were  
101 similar among individuals of the same morphological species but differed noticeably across  
102 different species. Therefore, MALDI protein spectra can be used as a tool to delimit species  
103 boundaries in arthropods that are vectors of pathogens. Nevertheless, fresh laboratory-reared  
104 specimens are routinely needed to build a reference library that meets the high-quality  
105 standards required for classification. This represents an important limitation for some arthropod  
106 groups, or assemblages, that are difficult to rear under laboratory conditions. In addition,  
107 epidemiological studies often rely on field-collected specimens preserved in ethanol for long-  
108 term storage in reference collections. To overcome these limitations, previous studies have  
109 opted for adjusting the comparison scores minimum-threshold limit for identification, lowering  
110 the manufacturer's recommended scores from 2.3 to 1.8 [21, 27] or even 1.3 [22, 28]. Hence,

111 mass fingerprinting for the identification of field-collected specimens that do not exist in a  
112 reference spectra library (or for those from which reference spectra cannot be generated under  
113 ideal conditions) requires an alternative, objective approach [11]. Moreover, most existing  
114 applications of MALDI to identify arthropod disease vectors have focused on relatively species-  
115 poor vector assemblages from Europe. This technique has been tested less-frequently in the  
116 new world tropics [19, 20, 22, 24, 27-36], where vector species richness is the greatest on  
117 Earth.

118         Here, we used MALDI as a scheme to identify Neotropical specimens of adult hard ticks  
119 derived from ethanol-preserved field collections. Specifically, we used machine learning and  
120 pattern recognition algorithms to classify protein spectra from the legs of field-collected  
121 specimens in order to identify a group of unknown samples with a self-curated reference  
122 library. MALDI is a promising tool for cataloging and quickly identifying large arthropod groups  
123 such as ticks [11]. Our results should contribute to the growing body of literature trying to  
124 address questions about feasibility, reliability and universality of the methodology for different  
125 environments and species that have not been evaluated before. Properly identifying disease  
126 vectors such as Ixodidae in highly diverse Neotropical countries, such as Panama, is a critical  
127 first step to predict and manage tick-borne zoonotic pathogens such as *Rickettsia* and  
128 arboviruses (e.g., arthropod-borne viruses).

129

130

## 131 **Methods**

### 132 **Sample preparation**

133 Ticks stored in ethanol for up to 5 years, and previously identified based on  
134 morphological characters, were taken from long-term storage in a -20 °C freezer (S1 Table). A  
135 total of 103 specimens from the following species were included in this study: *Amblyomma*  
136 *mixtum* (*cajennense*), *Amblyomma calcaratum*, *Amblyomma dissimile*, *Amblyomma geayi*,  
137 *Amblyomma nodosum*, *Amblyomma oblongoguttatum*, *Amblyomma ovale*, *Amblyomma*  
138 *pecarium*, *Amblyomma sabanerae*, *Amblyomma varium*, *Amblyomma naponense*,  
139 *Amblyomma tapirellum*, *Ixodes affinis*, *Ixodes boliviensis*, *Dermacentor nitens*, *Haemaphysalis*  
140 *juxtackochi*, *Rhipicephalus microplus* and *Rhipicephalus sanguineus*. Samples were prepared  
141 following previously published protocols with minor modifications [21, 22]. Briefly, we removed  
142 either the left or the right anterior leg from each tick using a scalpel. The leg was then put in  
143 tube with 300 µL ultrapure water followed by the addition of 900 µL of 100% ethanol. These  
144 tubes were vortexed for 15 s and centrifuged at 13,000 RPM for 2 min. After centrifugation, the  
145 supernatant was poured off from the sample tube, which was left to dry for 15 min.  
146 Subsequently, the legs were resuspended in 60 µL 70% formic acid and 60 µL 100%  
147 acetonitrile and homogenized in the microtube using a manual pestle. The samples were  
148 placed in a Branson 1510 ultra-sonicator (Branson, Danbury, CT, USA) for 60 minutes in ice  
149 water, and then vortexed for 15 s and centrifuged again at 13,000 RPM for 2 min. 1 µL of  
150 supernatant was pipetted onto a polished steel MALDI plate and covered with 1 µL of HCCA  
151 matrix. After letting the plate dry, it was inserted into the MALDI mass spectrometer to record  
152 the protein spectra from tick legs.

153

154

## 155 **MALDI mass spectrometry parameters**

156 We used an UltrafleXtreme III spectrometer (Bruker Daltonics, Bremen, Germany) to  
157 generate the protein mass spectra of each specimen. The equipment has a MALDI source, a  
158 time-of-flight (TOF) mass analyzer, and a 2KHz Smartbeam™-II neodymium-doped yttrium  
159 aluminum garnet (Nd:YAG) solid-state laser ( $\lambda=355$  nm) that we used in positive polarization  
160 mode. All spectra were automatically acquired in the range of 2,000 to 20,000 m/z in linear  
161 mode for the detection of the most abundant protein ions. Each spectrum represented the  
162 accumulation of 5,100 shots with 300 shots taken at a time, and the acquisition was done in  
163 random-walk mode with a laser power in the range of 50% to 100% (global laser attenuation at  
164 30%). The software FlexAnalysis™ (Bruker) was used to analyze the mass spectra initially  
165 and to evaluate number of ion peaks and their intensity. Visual comparisons of the mass  
166 spectra from different tick species gave initial indications of dominant ion peaks that would  
167 suggest possible classification into discrete groups. Mass spectra that did not include at least  
168 one ion peak with an intensity of 1000 a.u. or more, were considered low quality and filtered  
169 out. All samples were placed and measured on three individual target wells with three technical  
170 replicates of the mass spectra collected per well.

171

## 172 **Data analysis, clustering algorithms and statistics**

173 The methodology has been described in detail previously by our group for the  
174 identification of adult mosquito legs [26], based on similar data analysis for face recognition  
175 [37, 38] and spectral classification using mass spectrometry [39, 40]. In brief, 239 mass  
176 spectra generated across 103 samples for all 18 species of morphologically-identified  
177 Neotropical hard ticks were classified using Principal Component Analysis (PCA) and Linear  
178 Discriminant Analysis (LDA), which are linear transformation techniques from the field of



179 Machine Learning that are commonly used for dimensionality reduction and classification.  
180 Dimensionality reduction can help decrease computational costs for classification, as well as  
181 avoid overfitting by minimizing the error in parameter estimation.

182 PCA is an “unsupervised” algorithm that generates vectors that correspond to the  
183 direction of maximal variance in the sample space. On the other hand, LDA is a “supervised”  
184 algorithm that considers class information to provide a basis that best discriminates the  
185 classes (*i.e.*, tick species) [37]. For both PCA and LDA analyses, we calculated the Euclidean  
186 distance between the vector describing the test sample and the average vector describing  
187 each class to identify a test sample. The class with the minimum distance with respect to the  
188 test sample was assigned as the identified species for that test sample. The LDA was applied  
189 over the data set expressed in terms of the coefficients (*i.e.*, principal components) obtained by  
190 the PCA. Thus, PCA reduced the dimensionality of the data, and the LDA provided the  
191 supervised classification.

192 The performance of the clustering algorithms was tested using Monte Carlo simulations  
193 over 1000 iterations per species to optimize training and cross-validation prediction success  
194 rates (Table 2). For each iteration, the data elements in each class were split randomly in  
195 approximately, but not less than, 20% of the elements for testing and the rest of the elements  
196 for training, for each species. For this analysis, we used the first 150 principal components  
197 from the PCA stage that explained 99.9% of the total variance, which after being projected for  
198 the LDA algorithm, also generated a 150-components data set. The number of components  
199 was chosen after a performance analysis, again using a Monte Carlo approach, that provided  
200 the best identification rates. Global and class positive identification rates were calculated to  
201 establish the classification capacity of the algorithm (Table 2). The positive identification rate

202 corresponds to the percent ratio between positive identifications performed by the algorithm  
203 and the real positive cases in the data.

204 For visualization purposes in the plots, species that were morphologically identified  
205 within the *Rhipicephalus* and *Ixodes* genera were separately compared against *Dermacentor*  
206 and *Haemaphysallis* for which there was only one species in each. All species that were  
207 morphologically identified within the *Amblyomma* genus were separately compared between  
208 themselves or against the *Ixodes* genera.

209

## 210 **Results**

211 Optical micrographs from 18 species of Neotropical hard ticks showed very clear  
212 differences among species in terms of adult morphological features (Fig 1, S1 Fig), which was  
213 well aligned with the expected unique mass spectra generated from each sample and taxon  
214 (Fig 2). The global automatic acquisition rate was 77% for all species (Table 1), confirming  
215 that, overall, the mass spectra of field-collected and ethanol preserved specimens allowed  
216 automatic acquisition of spectra. In fact, automatic acquisition of spectra results in faster and  
217 more objective data acquisition than performing spectra collection manually. The percentage of  
218 automatic spectra acquisition with the MALDI ranged from 50 % for *A. mixtum (cajennense)*, *I.*  
219 *boliviensis* and *R. sanguineus* to 100% for several of the species, including *A. calcaratum*, *A.*  
220 *geayi*, *A. sabanerae*, *I. affinis*, and *R. microplus* (Table 1). The time stored in ethanol or the  
221 location of sample origin did not seem to explain the variable percentages of automatic spectra  
222 collection (S1 Table). Spectra from freshly collected specimens stored dry at -20 °C, used to  
223 establish the methodology, exhibited the best signals, with better-defined spectral peaks and  
224 higher signal-to-noise ratio.

225 In addition, the specimens within each species showed consistently similar protein  
226 profiles, regardless of their taxonomic genera, sex, collection date and/or sampling location  
227 (Fig 2, Table S1). Mean protein spectra for tick species differed visually among taxa and the  
228 differences appeared to be related to their degree of phylogenetic relatedness (Fig 2). For  
229 example, species within the genera *Ixodes*, *Rhipicephalus*, and *Amblyomma* were more similar  
230 among themselves in terms of the ions peak number and mass over charge ( $m/z$ ) position in  
231 their mass spectra than species from different genera. Nonetheless, some closely related  
232 species within the *Amblyomma* genus such as *A. mixtum (cajennense)*, *A. varium*, and *A.*  
233 *tapirellum* also showed fairly distinct protein spectra (Fig 2), which motivated the application of  
234 clustering algorithms for their classification.

235

236 **Figure 1. Optical micrographs of Neotropical hard ticks.** The image shows the dorsal and ventral sides for 6 of  
237 the 18 species of hard ticks in the genus *Amblyomma*, *Dermacentor*, *Haemaphysalis*, *Ixodes* and *Rhipicephalus*.  
238 The images for the full assemblage of 18 species can be found in S1 Fig.

239

240

241 **Table 1. Description of samples subjected to analysis with the MALDI mass**  
 242 **spectrometry procedure.**

| Species Name                         | # of samples | Locality code | # of expected spectra | # of obtained spectra | MALDI automatic spectra acquisition rate (%) |
|--------------------------------------|--------------|---------------|-----------------------|-----------------------|----------------------------------------------|
| <i>Amblyomma mixtum (cajennense)</i> | 4            | a             | 12                    | 6                     | 50%                                          |
| <i>Amblyomma calcaratum</i>          | 5            | a, b          | 15                    | 15                    | 100%                                         |
| <i>Amblyomma dissimile</i>           | 4            | c             | 12                    | 9                     | 75%                                          |
| <i>Amblyomma geayi</i>               | 4            | d             | 12                    | 12                    | 100%                                         |
| <i>Amblyomma nodosum</i>             | 4            | a             | 12                    | 10                    | 83%                                          |
| <i>Amblyomma oblongoguttatum</i>     | 4            | a, e          | 12                    | 8                     | 67%                                          |
| <i>Amblyomma ovale</i>               | 4            | e             | 12                    | 11                    | 92%                                          |
| <i>Amblyomma pecarium</i>            | 4            | e             | 12                    | 11                    | 92%                                          |
| <i>Amblyomma sabanerae</i>           | 3            | f             | 9                     | 9                     | 100%                                         |
| <i>Amblyomma varium</i>              | 4            | g             | 12                    | 9                     | 75%                                          |
| <i>Amblyomma naponense</i>           | 5            | f             | 15                    | 9                     | 60%                                          |
| <i>Amblyomma tapirellum</i> *        | 26           | e, g          | 78                    | 56                    | 72%                                          |
| <i>Ixodes affinis</i>                | 4            | e             | 12                    | 12                    | 100%                                         |
| <i>Ixodes boliviensis</i>            | 4            | e             | 12                    | 6                     | 50%                                          |
| <i>Dermacentor nitens</i>            | 4            | c             | 12                    | 9                     | 75%                                          |
| <i>Haemaphysalis juxtackochi</i>     | 6            | a, e          | 18                    | 11                    | 61%                                          |
| <i>Rhipicephalus microplus</i>       | 10           | c, d          | 30                    | 30                    | 100%                                         |
| <i>Rhipicephalus sanguineus</i>      | 4            | a             | 12                    | 6                     | 50%                                          |
| <b>Total</b>                         | <b>103</b>   | <b>a-g</b>    | <b>309</b>            | <b>239</b>            | <b>77%</b>                                   |

243  
 244 (a) = Panama: Chorrera, Las Pavas; (b) = Panama: Colon, Madden Road; (c) = Panama: Colon, Achiote; (d)  
 245 = Panama: Panama, Capira; (e) Panama: Colon, Barro Colorado Island; (f) Panama: Colon, Sierra Llorona  
 246 Lodge; (g) Panama: Colon, Gamboa. (\*) Indicates some specific samples that upon collection were stored  
 247 fresh in Silica Gel (For more metadata information about these samples see also S1 Table).

248

249 **Figure 2.** Baseline-corrected and smoothed spectra for 18 species of ticks in the genus *Amblyomma*, *Dermacentor*,  
250 *Haemaphysalis*, *Ixodes* and *Rhipicephalus*. Major ion peaks and their molecular weights are annotated in the range  
251 of 2,000 to 20,000 m/z for all species.

252

253 Distinct mass spectra profiles between morphologically identified ixodid species could  
254 be classified by an unsupervised PCA algorithm to identify specimens. The quantitative  
255 performance of the PCA algorithm was assessed per species (Table 2), and visually confirmed  
256 with the graphic clustering presented in 3D plots (Fig 3). The PCA global positive identification  
257 rate was 91.2%, with 14 out of 18 species having higher than 90 % positive identification rate.  
258 The PCA graphs showed that most species separated in well-defined clusters, and the  
259 distance among clusters seemed to be related to the degree of phylogenetic relatedness as  
260 evidenced by the clear separation from the specimens of *Dermacentor* and *Rhipicephalus* with  
261 those from *Haemaphysallis* and *Ixodes* (Fig 3A, B), or just between the specimens of  
262 *Amblyomma* (Fig 3C). When comparing species within the genus *Amblyomma* against those  
263 from *Ixodes*, again the spectra from specimens of each species clustered together with limited  
264 overlap between groups and those from different genera were clearly separated (Fig 3D).

265

266 **Figure 3.** Principal component analysis (PCA) of individual species plotted against first, second and third principal  
267 components (PC). All species were classified using a Monte Carlo simulation with 1000 iterations, in which 80%  
268 of the samples were used as training set (□) and the remaining 20% as test set (• for positive identifications and +  
269 for negative ones). The cluster centroid of each species is also presented in the graph (◇). The plots show (A) the  
270 training and test sets for the species belonging to the *Dermacentor*, *Haemaphysalis*, *Ixodes* and *Rhipicephalus*  
271 genera, and (B) only the test sets for better visualization; as well as the training set and test set of (C)  
272 *Amblyomma* species alone or (D) *Amblyomma* in combination with *Ixodes* genera. The unsupervised PCA  
273 algorithm had a global positive identification rate of 91.2%. These 3D plots represent only one of the 1000 Monte  
274 Carlo iterations performed with the algorithm.

275

276 In addition, the LDA clustering analysis showed a global positive identification rate of  
277 94.2% (Fig 4; Table 2), with 14 out of 18 species having higher than 97.8 % positive  
278 identification rate. The range of positive identification rates went from 100% (best score  
279 possible) for *A. mixtum (cajennense)*, *A. nodosum*, *A. oblongoguttatum*, *A. ovale*, *A. varium*, *A.*  
280 *naponense* and *R. sanguineus* to 45.6% for *D. nitens*. The 3D representation plots of the LDA  
281 clustering displayed that the separation between species was more pronounced than with PCA  
282 when comparing species from different genera, confirming the improved quantitative results of  
283 the performance of the LDA algorithm (Table 2).

284

285 **Figure 4.** Linear Discriminant Analysis (LDA) applied to spectra from tick species of the genera *Amblyomma*,  
286 *Dermacentor*, *Haemaphysalis*, *Ixodes* and *Rhipicephalus*. The plots show (A) the training and test sets for species  
287 in the *Dermacentor*, *Haemaphysalis*, *Ixodes* and *Rhipicephalus* genera projected over the first three components  
288 of the LDA, as well as (B) only the test set for better visualization; and also the training and test sets for (C) the  
289 *Amblyomma* genus alone, as well as (D) the *Amblyomma* genus compared to the *Ixodes* genus. These 3D plots  
290 represent only one of the 1000 Monte Carlo iterations performed with the algorithm. The supervised LDA  
291 algorithm had a 94.2% global positive identification rate.

292 **Table 2. Performance of PCA and LDA clustering algorithms.**

| Species Name                                     | PCA Positive Identification Rate (%) | LDA Positive Identification Rate (%) | Spectra per Class | # Training Elements | # Test Elements |
|--------------------------------------------------|--------------------------------------|--------------------------------------|-------------------|---------------------|-----------------|
| <i>Amblyomma mixtum</i><br>( <i>cajennense</i> ) | 100.0%                               | 100.0%                               | 6                 | 4000                | 2000            |
| <i>Amblyomma calcaratum</i>                      | 100.0%                               | 99.6%                                | 15                | 12000               | 3000            |
| <i>Amblyomma dissimile</i>                       | 67.6%                                | 67.6%                                | 9                 | 7000                | 2000            |
| <i>Amblyomma geayi</i>                           | 99.1%                                | 99.6%                                | 12                | 9000                | 3000            |
| <i>Amblyomma nodosum</i>                         | 100.0%                               | 100.0%                               | 10                | 8000                | 2000            |
| <i>Amblyomma oblongoguttatum</i>                 | 100.0%                               | 100.0%                               | 8                 | 6000                | 2000            |
| <i>Amblyomma ovale</i>                           | 100.0%                               | 100.0%                               | 11                | 8000                | 3000            |
| <i>Amblyomma pecarium</i>                        | 99.8%                                | 99.0%                                | 11                | 8000                | 3000            |
| <i>Amblyomma sabanerae</i>                       | 69.3%                                | 85.9%                                | 9                 | 7000                | 2000            |
| <i>Amblyomma varium</i>                          | 99.8%                                | 100.0%                               | 9                 | 7000                | 2000            |
| <i>Amblyomma naponense</i>                       | 100.0%                               | 100.0%                               | 9                 | 7000                | 2000            |
| <i>Amblyomma tapirellum</i>                      | 97.8%                                | 97.8%                                | 56                | 44000               | 12000           |
| <i>Dermacentor nitens</i>                        | 21.7%                                | 45.6%                                | 12                | 9000                | 3000            |
| <i>Haemaphysalis juxtackochi</i>                 | 90.9%                                | 97.8%                                | 6                 | 4000                | 2000            |
| <i>Ixodes affinis</i>                            | 84.0%                                | 89.5%                                | 9                 | 7000                | 2000            |
| <i>Ixodes boliviensis</i>                        | 96.8%                                | 98.8%                                | 11                | 8000                | 3000            |
| <i>Rhipicephalus microplus</i>                   | 93.1%                                | 98.7%                                | 30                | 24000               | 6000            |
| <i>Rhipicephalus sanguineus</i>                  | 100.0%                               | 100.0%                               | 6                 | 4000                | 2000            |
| <b>Global</b>                                    | <b>91.2%</b>                         | <b>94.2%</b>                         | <b>239</b>        | <b>183000</b>       | <b>56000</b>    |

293

294

## 295 **Discussion**

296 Our results show that MALDI mass spectra of highly abundant proteins in arthropod  
297 legs served as fingerprints to identify samples of 18 species of Neotropical hard ticks using  
298 machine learning and pattern recognition algorithms to create a self-curated reference library.  
299 We compared smoothed and baseline-corrected spectra generated from unknown field-  
300 collected tick samples against the mean spectra from a subset of the same field samples that  
301 had already been identified through traditional means. To systematize this process, we used  
302 PCA and LDA algorithms to classify mass spectra without prior establishment of a high-quality  
303 reference library, which typically requires laboratory-reared specimens that may not be  
304 possible to obtain for all species. Global positive identification rates of up to 94.2% were  
305 achieved with this methodology, offering a rapid, reliable and objective approach to identify  
306 hard tick species, which will likely improve as more specimens are evaluated and included in  
307 our database.

308 These outcomes agree with our previous work [26] in which we used a similar approach  
309 to classify field-collected samples of 11 morphologically-identified species of *Anopheles*  
310 mosquitoes. In that study, Neotropical *Anopheles* samples were stored dry in silica gel at -20  
311 °C, which seemed to avoid sample degradation and maintain spectral quality. This contrasts  
312 with the present study, where most of our specimens were stored in ethanol at -20 °C for  
313 several years. Thus, our findings confirm that our novel analytical approach using MALDI and  
314 PCA/LDA clustering algorithms is robust for species classification regardless of the arthropod  
315 assemblage, sample storing conditions, and the lack of a high-quality reference library. Our  
316 results herein also show that both classification algorithms, PCA and LDA, were capable of  
317 clustering and recognizing spectra from up to 18 different tick species, including roughly 50 %  
318 of Ixodid taxa (e.g., both ecologically dominant and rare taxa) reported for Panama [26, 41].



319 LDA outcomes were more discriminant and robust than PCA overall, but PCA also classified  
320 species from different genera with over 91 % accuracy and consistency. LDA was able to  
321 cluster each of the 18 species of ticks with validation and cross-validation scores above 94 %,  
322 both between and within genera. As expected, the clustering algorithm was most accurate for  
323 distinctly related phylogenetic species (i.e., *Ixodes*, *Rhipicephalus* and *Haemaphysalis*  
324 genera), with higher than 97 % success rate in most of these cases, than for closely related  
325 species (i.e., *Amblyomma* genus).

326         Although the number of samples analyzed for some ixodid species was relatively low,  
327 several of these taxa are considered cryptic species complexes [42] and have been implicated  
328 as vectors of human pathogens in Panama as well as more broadly, including *A. mixtum*  
329 (*cajennense*) and *D. nitens*, the likely vectors of *Rickettsia rickettsii*, known to cause Rocky  
330 Mountain spotted fever [43]. We also included samples of *A. tapirellum*, *A. oblongoguttatum*  
331 and *H. juxtakochi*, three species from which human pathogens have been previously isolated  
332 [44], such as: *Coxiella*, whose members cause Q fever; *Ehrlichia*, which causes ehrlichiosis  
333 infection; and *Rickettsia*, which causes a variety of bacterial infections in humans and other  
334 animals. These results are important because our species identification platform can serve as  
335 an additional tool for Health Ministries in Panama and other countries, to monitor, predict and  
336 manage tick-borne zoonotic pathogens.

337         Morphological taxonomic identification of ixodid ticks can be enhanced by molecular  
338 techniques such as the DNA barcoding [8, 45], but this procedure is laborious, expensive and  
339 needs a well-trained lab-technician. Studies show that typical DNA barcoding costs can range  
340 from \$2 to \$5 per sample, with difficult-to-extract samples increasing the cost two-fold or more  
341 [46, 47]; while costs associated to MALDI species identification have been calculated to be  
342 less than \$0.50 per sample [48-50]. Furthermore, a comprehensive repository of DNA

343 sequences (e.g., DNA barcodes) is needed in order to test species limits, yet only a handful of  
344 Neotropical tick species are represented in Genbank [51] or BOLD [52] repositories, which  
345 could limit identification to the most common taxa only. In addition, DNA barcoding  
346 occasionally fails to delimit species boundaries due to ambiguous evolutionary relationships  
347 among closely related tick species [45].

348         The long-term goal of our analytical approach with MALDI is to offer an open-source,  
349 web-based platform where users can upload the protein mass spectra of their known and  
350 unknown specimens to increase the number of species covered and to improve the power of  
351 our clustering algorithms. This crowd-sourced approach could be more cost effective, given  
352 that it is not necessary to generate a reference library of well-curated samples. Instead, field  
353 samples can be taxonomically assigned as they arrive to the laboratory using a correctly  
354 matched protein fingerprint, while unidentified samples can be identified with traditional  
355 methods and added as new entries into the growing self-curated reference database.

356         In conclusion, the present study used MALDI mass spectrometry as a tool to rapidly  
357 identify Neotropical specimens of adult hard ticks that had been preserved in ethanol for  
358 several years. Our algorithms were capable of identifying specimens from the 18 tick species  
359 evaluated, based on their protein spectra “fingerprint” with up to 94% cross-validation  
360 capability. This is the first report of the protein mass spectra from the leg for most of these  
361 Neotropical tick species. Large arthropod groups such as ticks are difficult to identify with  
362 currently available strategies from commercial vendors, forcing the user to lower the “quality”  
363 bar of a positive match to enhance the percentage of correct identification. Our MALDI/self-  
364 curated library approach, although still serving as an auxiliary technique to traditional  
365 identification methods (and not necessarily replacing them), would reduce considerably the  
366 number of samples that would require morphological identification or DNA barcoding. This will

367 reduce the time and cost needed to integrate these techniques in routine surveillance  
368 programs in Neotropical regions where tick diversity remains relatively uncharacterized.

369

## 370 **Acknowledgements**

371 Special thanks to Philip Davis and Eric Rodríguez from the University of Panama, for assisting  
372 with tick collections during the study. We are grateful to Aishwarya Sunderrajan, from the  
373 Madras Institute of Technology, India, for her support editing some of the figures for this work.  
374 We want to thank the governmental personnel at the Panamanian Ministry of Environment  
375 (*MiAmbiente*) for supporting scientific collecting of ticks in Panama.

376

## 377 **References**

- 378 1. Estrada-Pena A, Jongejan F. Ticks feeding on humans: a review of records on human-biting Ixodoidea  
379 with special reference to pathogen transmission. *Exp Appl Acarol.* 1999;23(9):685-715. Epub 1999/12/03. doi:  
380 10.1023/a:1006241108739. PubMed PMID: 10581710.
- 381 2. McCoy KD, Leger E, Dietrich M. Host specialization in ticks and transmission of tick-borne diseases: a  
382 review. *Front Cell Infect Microbiol.* 2013;3:57. Epub 2013/10/11. doi: 10.3389/fcimb.2013.00057. PubMed  
383 PMID: 24109592; PubMed Central PMCID: PMC3790072.
- 384 3. Parola P, Labruna MB, Raoult D. Tick-borne rickettsioses in America: unanswered questions and  
385 emerging diseases. *Curr Infect Dis Rep.* 2009;11(1):40-50. Epub 2008/12/20. doi: 10.1007/s11908-009-0007-5.  
386 PubMed PMID: 19094824.
- 387 4. Jongejan F, Uilenberg G. The global importance of ticks. *Parasitology.* 2004;129 Suppl:S3-14. Epub  
388 2005/06/09. doi: 10.1017/s0031182004005967. PubMed PMID: 15938502.
- 389 5. Estripeaut D, Aramburu MG, Saez-Llorens X, Thompson HA, Dasch GA, Paddock CD, et al. Rocky  
390 Mountain spotted fever, Panama. *Emerg Infect Dis.* 2007;13(11):1763-5. Epub 2008/01/26. doi:  
391 10.3201/eid1311.070931. PubMed PMID: 18217566; PubMed Central PMCID: PMC3375809.
- 392 6. Hidalgo M, Miranda J, Heredia D, Zambrano P, Vesga JF, Lizarazo D, et al. Outbreak of Rocky Mountain  
393 spotted fever in Cordoba, Colombia. *Mem Inst Oswaldo Cruz.* 2011;106(1):117-8. Epub 2011/02/23. doi:  
394 10.1590/s0074-02762011000100019. PubMed PMID: 21340366.
- 395 7. Tribaldos M, Zaldivar Y, Bermudez S, Samudio F, Mendoza Y, Martinez AA, et al. Rocky Mountain spotted  
396 fever in Panama: a cluster description. *J Infect Dev Ctries.* 2011;5(10):737-41. Epub 2011/10/15. doi:  
397 10.3855/jidc.2189. PubMed PMID: 21997944.
- 398 8. Arguello AP, Hun L, Rivera P, Taylor L. A fatal urban case of rocky mountain spotted fever presenting an  
399 eschar in San Jose, Costa Rica. *Am J Trop Med Hyg.* 2012;87(2):345-8. Epub 2012/08/03. doi:  
400 10.4269/ajtmh.2012.12-0153. PubMed PMID: 22855769; PubMed Central PMCID: PMC3414575.
- 401 9. Guglielmone AA, Robbins RG, Apanaskevich DA, Petney TN, Estrada-Peña A, Horak IG. *The Hard Ticks of*  
402 *the World (Acari: Ixodida: Ixodidae)*. Dordrecht: Springer Netherlands; 2014.

- 403 10. Martins TF, Onofrio VC, Barros-Battesti DM, Labruna MB. Nymphs of the genus *Amblyomma* (Acari:  
404 Ixodidae) of Brazil: descriptions, redescrptions, and identification key. *Ticks Tick Borne Dis.* 2010;1(2):75-99.  
405 Epub 2011/07/21. doi: 10.1016/j.ttbdis.2010.03.002. PubMed PMID: 21771514.
- 406 11. Murugaiyan J, Roesler U. MALDI-TOF MS Profiling-Advances in Species Identification of Pests, Parasites,  
407 and Vectors. *Front Cell Infect Microbiol.* 2017;7:184. Epub 2017/05/31. doi: 10.3389/fcimb.2017.00184. PubMed  
408 PMID: 28555175; PubMed Central PMCID: PMC5430024.
- 409 12. Croxatto A, Prod'hom G, Greub G. Applications of MALDI-TOF mass spectrometry in clinical diagnostic  
410 microbiology. *FEMS Microbiol Rev.* 2012;36(2):380-407. Epub 2011/11/19. doi: 10.1111/j.1574-  
411 6976.2011.00298.x. PubMed PMID: 22092265.
- 412 13. Singhal N, Kumar M, Viridi JS. MALDI-TOF MS in clinical parasitology: applications, constraints and  
413 prospects. *Parasitology.* 2016;143(12):1491-500. Epub 2016/07/09. doi: 10.1017/S0031182016001189. PubMed  
414 PMID: 27387025.
- 415 14. Tan KE, Ellis BC, Lee R, Stamper PD, Zhang SX, Carroll KC. Prospective evaluation of a matrix-assisted  
416 laser desorption ionization-time of flight mass spectrometry system in a hospital clinical microbiology laboratory  
417 for identification of bacteria and yeasts: a bench-by-bench study for assessing the impact on time to  
418 identification and cost-effectiveness. *J Clin Microbiol.* 2012;50(10):3301-8. Epub 2012/08/03. doi:  
419 10.1128/JCM.01405-12. PubMed PMID: 22855510; PubMed Central PMCID: PMC3457442.
- 420 15. Ge MC, Kuo AJ, Liu KL, Wen YH, Chia JH, Chang PY, et al. Routine identification of microorganisms by  
421 matrix-assisted laser desorption ionization time-of-flight mass spectrometry: Success rate, economic analysis,  
422 and clinical outcome. *J Microbiol Immunol Infect.* 2017;50(5):662-8. Epub 2016/07/19. doi:  
423 10.1016/j.jmii.2016.06.002. PubMed PMID: 27426930.
- 424 16. Lai YH, Wang YS. Matrix-Assisted Laser Desorption/Ionization Mass Spectrometry: Mechanistic Studies  
425 and Methods for Improving the Structural Identification of Carbohydrates. *Mass Spectrom (Tokyo).* 2017;6(Spec  
426 Iss 2):S0072. Epub 2017/09/30. doi: 10.5702/massspectrometry.S0072. PubMed PMID: 28959517; PubMed  
427 Central PMCID: PMC5610957.
- 428 17. Florio W, Tavanti A, Barnini S, Ghelardi E, Lupetti A. Recent Advances and Ongoing Challenges in the  
429 Diagnosis of Microbial Infections by MALDI-TOF Mass Spectrometry. *Front Microbiol.* 2018;9:1097. Epub  
430 2018/06/14. doi: 10.3389/fmicb.2018.01097. PubMed PMID: 29896172; PubMed Central PMCID:  
431 PMC5986882.
- 432 18. Suarez E, Nguyen HP, Ortiz IP, Lee KJ, Kim SB, Krzywinski J, et al. Matrix-assisted laser  
433 desorption/ionization-mass spectrometry of cuticular lipid profiles can differentiate sex, age, and mating status  
434 of *Anopheles gambiae* mosquitoes. *Anal Chim Acta.* 2011;706(1):157-63. Epub 2011/10/15. doi:  
435 10.1016/j.aca.2011.08.033. PubMed PMID: 21995923.
- 436 19. Lafri I, Almeras L, Bitam I, Caputo A, Yssouf A, Forestier CL, et al. Identification of Algerian Field-Caught  
437 Phlebotomine Sand Fly Vectors by MALDI-TOF MS. *PLoS Negl Trop Dis.* 2016;10(1):e0004351. Epub 2016/01/16.  
438 doi: 10.1371/journal.pntd.0004351. PubMed PMID: 26771833; PubMed Central PMCID: PMC4714931.
- 439 20. Muller P, Pfluger V, Wittwer M, Ziegler D, Chandre F, Simard F, et al. Identification of cryptic *Anopheles*  
440 mosquito species by molecular protein profiling. *PLoS One.* 2013;8(2):e57486. Epub 2013/03/08. doi:  
441 10.1371/journal.pone.0057486. PubMed PMID: 23469000; PubMed Central PMCID: PMC3585343.
- 442 21. Yssouf A, Almeras L, Berenger JM, Laroche M, Raoult D, Parola P. Identification of tick species and  
443 disseminate pathogen using hemolymph by MALDI-TOF MS. *Ticks Tick Borne Dis.* 2015;6(5):579-86. Epub  
444 2015/06/09. doi: 10.1016/j.ttbdis.2015.04.013. PubMed PMID: 26051210.
- 445 22. Yssouf A, Flaudrops C, Drali R, Kernif T, Socolovschi C, Berenger JM, et al. Matrix-assisted laser  
446 desorption ionization-time of flight mass spectrometry for rapid identification of tick vectors. *J Clin Microbiol.*  
447 2013;51(2):522-8. Epub 2012/12/12. doi: 10.1128/JCM.02665-12. PubMed PMID: 23224087; PubMed Central  
448 PMCID: PMC3553915.
- 449 23. Yssouf A, Socolovschi C, Flaudrops C, Ndiath MO, Sougoufara S, Dehecq JS, et al. Matrix-assisted laser  
450 desorption ionization--time of flight mass spectrometry: an emerging tool for the rapid identification of

- 451 mosquito vectors. *PLoS One*. 2013;8(8):e72380. Epub 2013/08/27. doi: 10.1371/journal.pone.0072380. PubMed  
452 PMID: 23977292; PubMed Central PMCID: PMC3744494.
- 453 24. Yssouf A, Socolovschi C, Leulmi H, Kernif T, Bitam I, Audoly G, et al. Identification of flea species using  
454 MALDI-TOF/MS. *Comp Immunol Microbiol Infect Dis*. 2014;37(3):153-7. Epub 2014/06/01. doi:  
455 10.1016/j.cimid.2014.05.002. PubMed PMID: 24878069.
- 456 25. Bennett KL, Gomez Martinez C, Almanza A, Rovira JR, McMillan WO, Enriquez V, et al. High infestation of  
457 invasive *Aedes* mosquitoes in used tires along the local transport network of Panama. *Parasit Vectors*.  
458 2019;12(1):264. Epub 2019/05/28. doi: 10.1186/s13071-019-3522-8. PubMed PMID: 31133041; PubMed Central  
459 PMCID: PMC6537307.
- 460 26. Loaiza JR, Almanza A, Rojas JC, Mejia L, Cervantes ND, Sanchez-Galan JE, et al. Application of matrix-  
461 assisted laser desorption/ionization mass spectrometry to identify species of Neotropical *Anopheles* vectors of  
462 malaria. *Malar J*. 2019;18(1):95. doi: 10.1186/s12936-019-2723-0. PubMed PMID: 30902057.
- 463 27. Dieme C, Yssouf A, Vega-Rua A, Berenger JM, Failloux AB, Raoult D, et al. Accurate identification of  
464 Culicidae at aquatic developmental stages by MALDI-TOF MS profiling. *Parasit Vectors*. 2014;7:544. Epub  
465 2014/12/03. doi: 10.1186/s13071-014-0544-0. PubMed PMID: 25442218; PubMed Central PMCID:  
466 PMC4273427.
- 467 28. Laroche M, Almeras L, Pecchi E, Bechah Y, Raoult D, Viola A, et al. MALDI-TOF MS as an innovative tool  
468 for detection of *Plasmodium* parasites in *Anopheles* mosquitoes. *Malar J*. 2017;16(1):5. Epub 2017/01/05. doi:  
469 10.1186/s12936-016-1657-z. PubMed PMID: 28049524; PubMed Central PMCID: PMC5209920.
- 470 29. Steinmann IC, Pfluger V, Schaffner F, Mathis A, Kaufmann C. Evaluation of matrix-assisted laser  
471 desorption/ionization time of flight mass spectrometry for the identification of ceratopogonid and culicid larvae.  
472 *Parasitology*. 2013;140(3):318-27. Epub 2012/11/23. doi: 10.1017/S0031182012001618. PubMed PMID:  
473 23171762.
- 474 30. Dvorak V, Halada P, Hlavackova K, Dokianakis E, Antoniou M, Volf P. Identification of phlebotomine sand  
475 flies (Diptera: Psychodidae) by matrix-assisted laser desorption/ionization time of flight mass spectrometry.  
476 *Parasit Vectors*. 2014;7:21. Epub 2014/01/16. doi: 10.1186/1756-3305-7-21. PubMed PMID: 24423215; PubMed  
477 Central PMCID: PMC3896986.
- 478 31. Hoppenheit A, Murugaiyan J, Bauer B, Steuber S, Clausen PH, Roesler U. Identification of Tsetse  
479 (*Glossina* spp.) using matrix-assisted laser desorption/ionisation time of flight mass spectrometry. *PLoS Negl*  
480 *Trop Dis*. 2013;7(7):e2305. Epub 2013/07/23. doi: 10.1371/journal.pntd.0002305. PubMed PMID: 23875040;  
481 PubMed Central PMCID: PMC3708848.
- 482 32. Karger A, Kampen H, Bettin B, Dautel H, Ziller M, Hoffmann B, et al. Species determination and  
483 characterization of developmental stages of ticks by whole-animal matrix-assisted laser desorption/ionization  
484 mass spectrometry. *Ticks Tick Borne Dis*. 2012;3(2):78-89. Epub 2012/04/11. doi: 10.1016/j.ttbdis.2011.11.002.  
485 PubMed PMID: 22487425.
- 486 33. Kaufmann C, Ziegler D, Schaffner F, Carpenter S, Pfluger V, Mathis A. Evaluation of matrix-assisted laser  
487 desorption/ionization time of flight mass spectrometry for characterization of *Culicoides nubeculosus* biting  
488 midges. *Med Vet Entomol*. 2011;25(1):32-8. Epub 2010/12/02. doi: 10.1111/j.1365-2915.2010.00927.x. PubMed  
489 PMID: 21118284.
- 490 34. Rothen J, Githaka N, Kanduma EG, Olds C, Pfluger V, Mwaura S, et al. Matrix-assisted laser  
491 desorption/ionization time of flight mass spectrometry for comprehensive indexing of East African ixodid tick  
492 species. *Parasit Vectors*. 2016;9:151. Epub 2016/03/17. doi: 10.1186/s13071-016-1424-6. PubMed PMID:  
493 26979606; PubMed Central PMCID: PMC4792108.
- 494 35. Kaufmann C, Schaffner F, Ziegler D, Pfluger V, Mathis A. Identification of field-caught *Culicoides* biting  
495 midges using matrix-assisted laser desorption/ionization time of flight mass spectrometry. *Parasitology*.  
496 2012;139(2):248-58. Epub 2011/10/20. doi: 10.1017/S0031182011001764. PubMed PMID: 22008297.
- 497 36. Diarra AZ, Almeras L, Laroche M, Berenger J-M, Koné AK, Bocoum Z, et al. Molecular and MALDI-TOF  
498 identification of ticks and tick-associated bacteria in Mali. *PLoS Negl Trop Dis*. 2017;11(7):e0005762. doi:  
499 10.1371/journal.pntd.0005762.

- 500 37. Belhumeur PN, Hespanha JP, Kriegman DJ. Eigenfaces vs. Fisherfaces: Recognition using class specific  
501 linear projection. *IEEE Trans Pattern Anal Mach Intell.* 1997;19(7):711-20.
- 502 38. Turk M, Pentland A. Eigenfaces for recognition. *J Cogn Neurosci.* 1991;3(1):71-86. Epub 1991/01/01. doi:  
503 10.1162/jocn.1991.3.1.71. PubMed PMID: 23964806.
- 504 39. Ryan L, Hany F, Bruce D. Probabilistic Disease Classification of Expression-Dependent Proteomic Data  
505 from Mass Spectrometry of Human Serum. *J Comput Biol.* 2003;10(6):925-46. doi:  
506 10.1089/106652703322756159. PubMed PMID: 14980018.
- 507 40. Satten GA, Datta S, Moura H, Woolfitt AR, Carvalho MdG, Carlone GM, et al. Standardization and  
508 denoising algorithms for mass spectra to classify whole-organism bacterial specimens. *Bioinformatics.*  
509 2004;20(17):3128-36. doi: 10.1093/bioinformatics/bth372.
- 510 41. Fairchild GB, Kohla GM, Tipton VJ. The ticks of Panama (Acarina: Ixodoidea). *Ectoparasites of Panama.*  
511 Chicago: Field Museum of Natural History; 1966. p. 167-219.
- 512 42. Nava S, Beati L, Labruna MB, Cáceres AG, Mangold AJ, Guglielmone AA. Reassessment of the taxonomic  
513 status of *Amblyomma cajennense* (Fabricius, 1787) with the description of three new species, *Amblyomma*  
514 *tonelliae* n. sp., *Amblyomma interandinum* n. sp. and *Amblyomma patinoi* n. sp., and reinstatement of  
515 *Amblyomma mixtum* Koch, 1844, and *Amblyomma sculptum* Berlese, 1888 (Ixodida: Ixodidae). *Ticks Tick Borne*  
516 *Dis.* 2014;5(3):252-76. doi: <https://doi.org/10.1016/j.ttbdis.2013.11.004>.
- 517 43. Lopes MG, May Junior J, Foster RJ, Harmsen BJ, Sanchez E, Martins TF, et al. Ticks and rickettsiae from  
518 wildlife in Belize, Central America. *Parasit Vectors.* 2016;9:62. Epub 2016/02/03. doi: 10.1186/s13071-016-1348-  
519 1. PubMed PMID: 26831147; PubMed Central PMCID: PMC4736261.
- 520 44. Parola P, Raoult D. Ticks and tickborne bacterial diseases in humans: an emerging infectious threat. *Clin*  
521 *Infect Dis.* 2001;32(6):897-928. Epub 2001/03/15. doi: 10.1086/319347. PubMed PMID: 11247714.
- 522 45. Miller MJ, Esser HJ, Loaiza JR, Herre EA, Aguilar C, Quintero D, et al. Molecular Ecological Insights into  
523 Neotropical Bird-Tick Interactions. *PLoS One.* 2016;11(5):e0155989. Epub 2016/05/21. doi:  
524 10.1371/journal.pone.0155989. PubMed PMID: 27203693; PubMed Central PMCID: PMC4874597.
- 525 46. Hebert PD, Gregory TR. The promise of DNA barcoding for taxonomy. *Syst Biol.* 2005;54(5):852-9. Epub  
526 2005/10/26. doi: 10.1080/10635150500354886. PubMed PMID: 16243770.
- 527 47. Stein ED, Martinez MC, Stiles S, Miller PE, Zakharov EV. Is DNA barcoding actually cheaper and faster  
528 than traditional morphological methods: results from a survey of freshwater bioassessment efforts in the United  
529 States? *PLoS One.* 2014;9(4):e95525. Epub 2014/04/24. doi: 10.1371/journal.pone.0095525. PubMed PMID:  
530 24755838; PubMed Central PMCID: PMC3995707.
- 531 48. Dhiman N, Hall L, Wohlfiel SL, Buckwalter SP, Wengenack NL. Performance and cost analysis of matrix-  
532 assisted laser desorption ionization-time of flight mass spectrometry for routine identification of yeast. *J Clin*  
533 *Microbiol.* 2011;49(4):1614-6. Epub 2011/01/29. doi: 10.1128/JCM.02381-10. PubMed PMID: 21270234;  
534 PubMed Central PMCID: PMC3122878.
- 535 49. El-Bouri K, Johnston S, Rees E, Thomas I, Bome-Mannathoko N, Jones C, et al. Comparison of bacterial  
536 identification by MALDI-TOF mass spectrometry and conventional diagnostic microbiology methods: agreement,  
537 speed and cost implications. *Br J Biomed Sci.* 2012;69(2):47-55. Epub 2012/08/10. PubMed PMID: 22872927.
- 538 50. Lagace-Wiens PR, Adam HJ, Karlowsky JA, Nichol KA, Pang PF, Guenther J, et al. Identification of blood  
539 culture isolates directly from positive blood cultures by use of matrix-assisted laser desorption ionization-time of  
540 flight mass spectrometry and a commercial extraction system: analysis of performance, cost, and turnaround  
541 time. *J Clin Microbiol.* 2012;50(10):3324-8. Epub 2012/08/10. doi: 10.1128/JCM.01479-12. PubMed PMID:  
542 22875888; PubMed Central PMCID: PMC3457416.
- 543 51. Clark K, Karsch-Mizrachi I, Lipman DJ, Ostell J, Sayers EW. GenBank. *Nucleic Acids Res.* 2016;44(D1):D67-  
544 D72. Epub 2015/11/20. doi: 10.1093/nar/gkv1276. PubMed PMID: 26590407.
- 545 52. Ratnasingham S, Hebert PDN. bold: The Barcode of Life Data System (<http://www.barcodinglife.org>).  
546 *Mol Ecol Notes.* 2007;7(3):355-64. doi: 10.1111/j.1471-8286.2007.01678.x. PubMed PMID: 18784790.

547

549 **Supporting information**

550 **Supporting figures and tables**

551

552 **S1 Figure. Optical micrographs of Neotropical hard ticks.** The image shows the dorsal and  
553 ventral sides for all 18 species of hard ticks in the genus *Amblyomma*, *Dermacentor*,  
554 *Haemaphysalis*, *Ixodes*, and *Rhipicephalus* used to generate protein spectra with our MALDI  
555 mass spectrometry approach.

556

557 **S1 Table. Metadata of specimens and species of hard tick (e.g., Ixodidae) collected in**  
558 **Panama. Available at: [https://github.com/mjmillerlab/maldi\\_ticks](https://github.com/mjmillerlab/maldi_ticks)**

559

560 **List of abbreviations**

561 MALDI: matrix-assisted laser desorption/ionization; PCA: principal component analysis; LDA:  
562 linear discriminant analysis; DNA: deoxyribonucleic acid; INDICASAT: Institute for Scientific  
563 Research and High Technology Services; STRI: Smithsonian Tropical Research Institute; SNI:  
564 National System of Investigation; UTP: Technological University of Panama; TOF: time-of-  
565 flight; MiAmbiente: Ministry of Environment.

566

567 **Ethics approval and consent to participate (Ethics statement)**

568 Not applicable

569

570 **Consent for publication**

571 Not applicable

572

573 **Availability of data and material**

574 The datasets used and/or analyzed during the current study are available from the  
575 corresponding author on reasonable request.

576

577 **Funding**

578 Financial support for this work was provided by SENACYT through the research grant  
579 GRID15-002 to JRL, LM, JSG, LFD and RAG. INDICASAT-AIP, UTP and STRI provided  
580 additional economic and logistic support. The SNI supports research activities by JRL (SNI 05-  
581 2016 & SNI 157-2017), JSG, LM, LFD, FM and RAG (SNI 91-2015 & SNI 146-2017). RAG is  
582 also supported by SENACYT grants FID14-066, ITE15-016.

583

584 **Competing interests**

585 The authors declare that they have no competing interests.

586

587 **Authors' contributions**

588 JRL and RAG designed and developed the experiments. JRL, EA and HJE collected and  
589 identified the ticks. AA, RH and MD performed the tests with the MALDI. JRL, JSG, FM, JK  
590 and RG analyzed the data and produced the graphs. JRL and RAG wrote the first draft of the  
591 paper and EA, LM, KLB, JSG, FM, JK, MJM, HJE, RH, MD, and LFL contributed comments to  
592 subsequent versions on it. All authors read and approved the final manuscript.

593



# Figure 1:

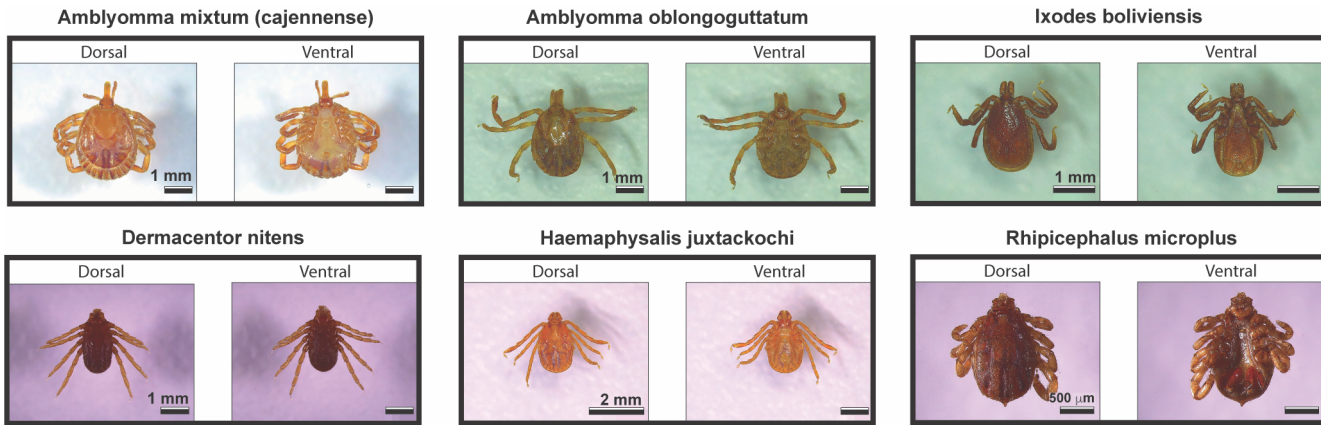

# Figure 2:

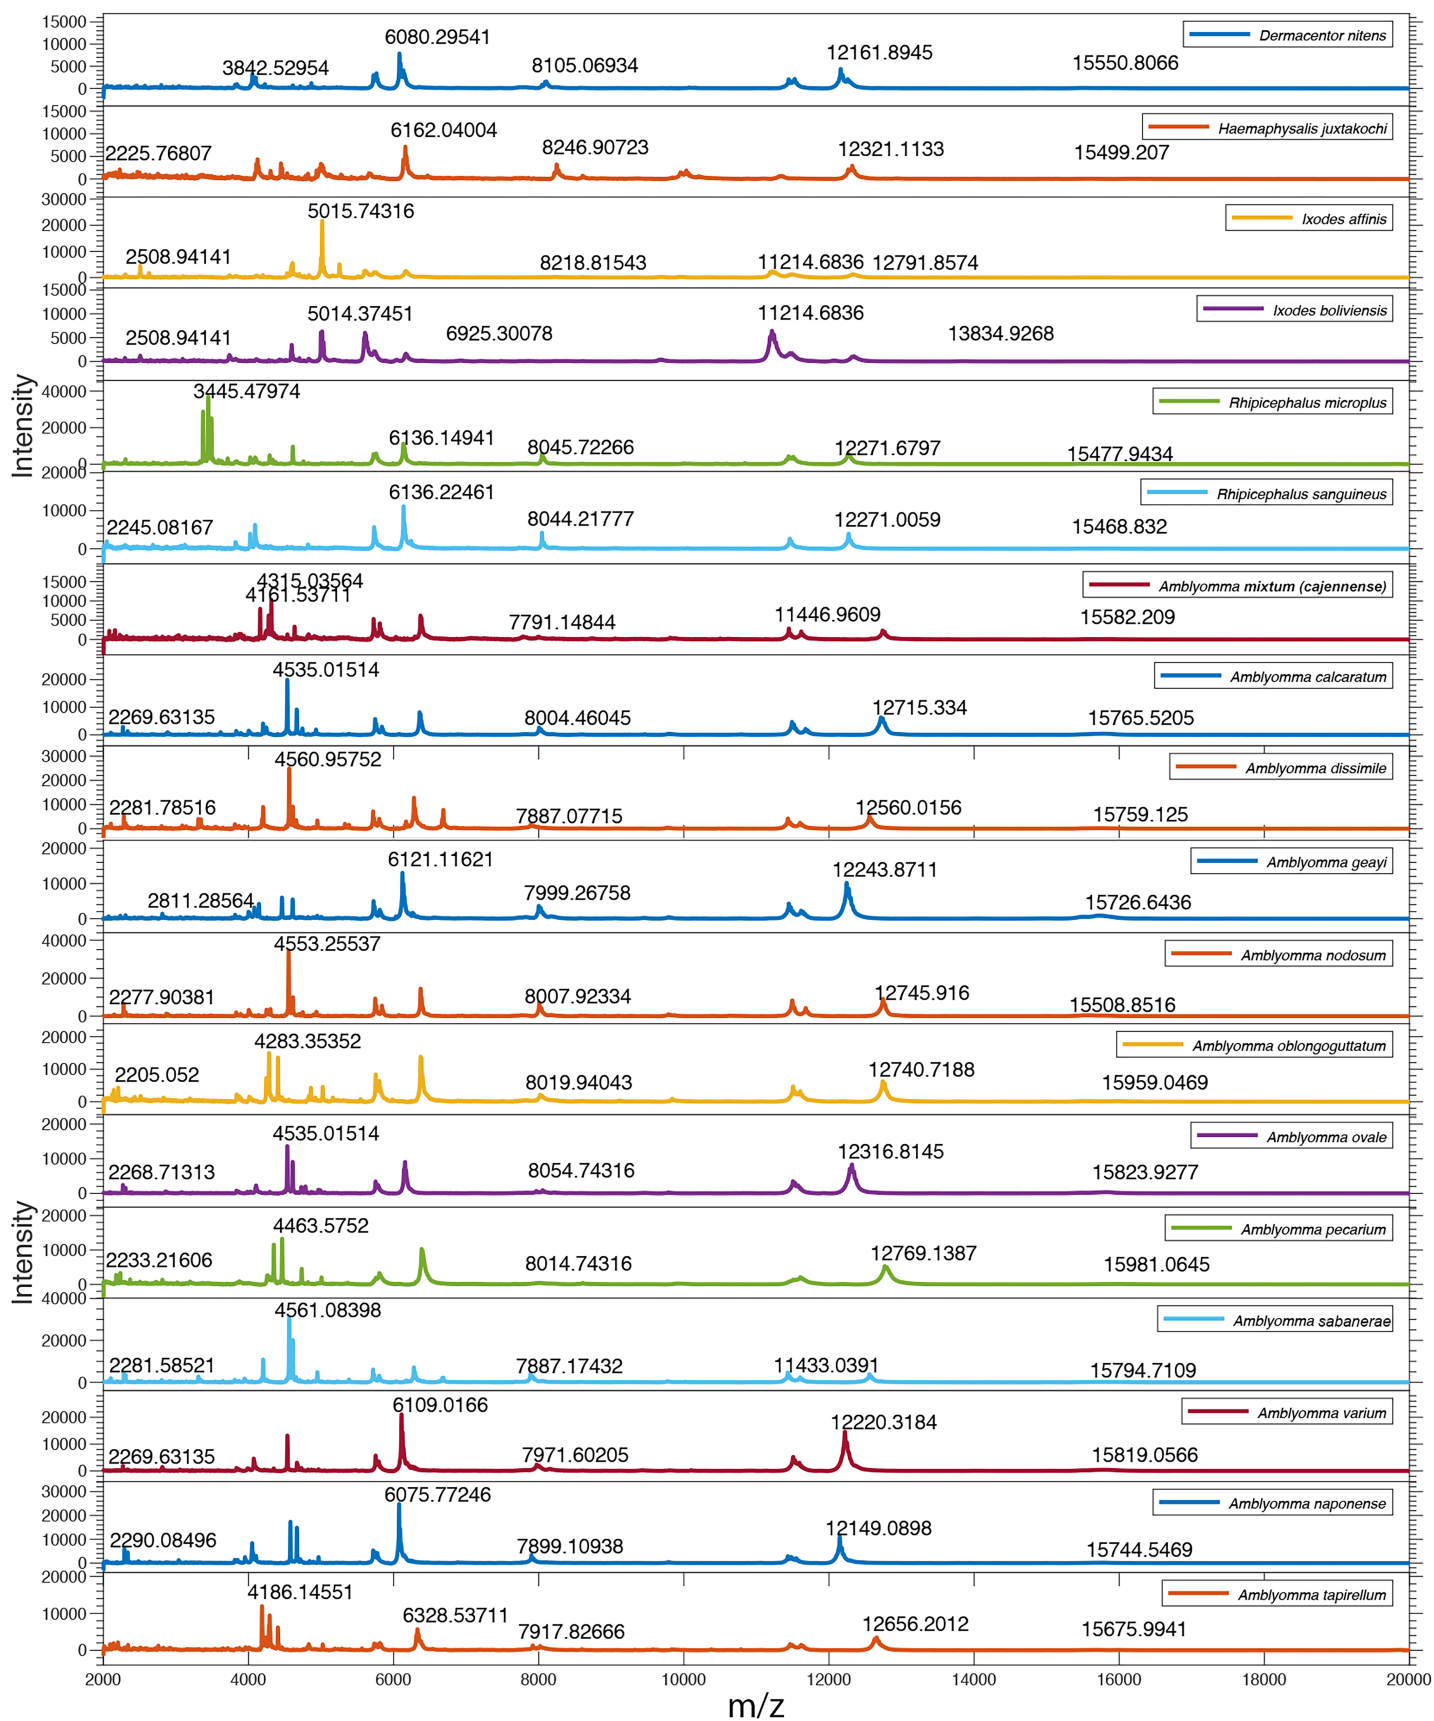

# Figure 3:

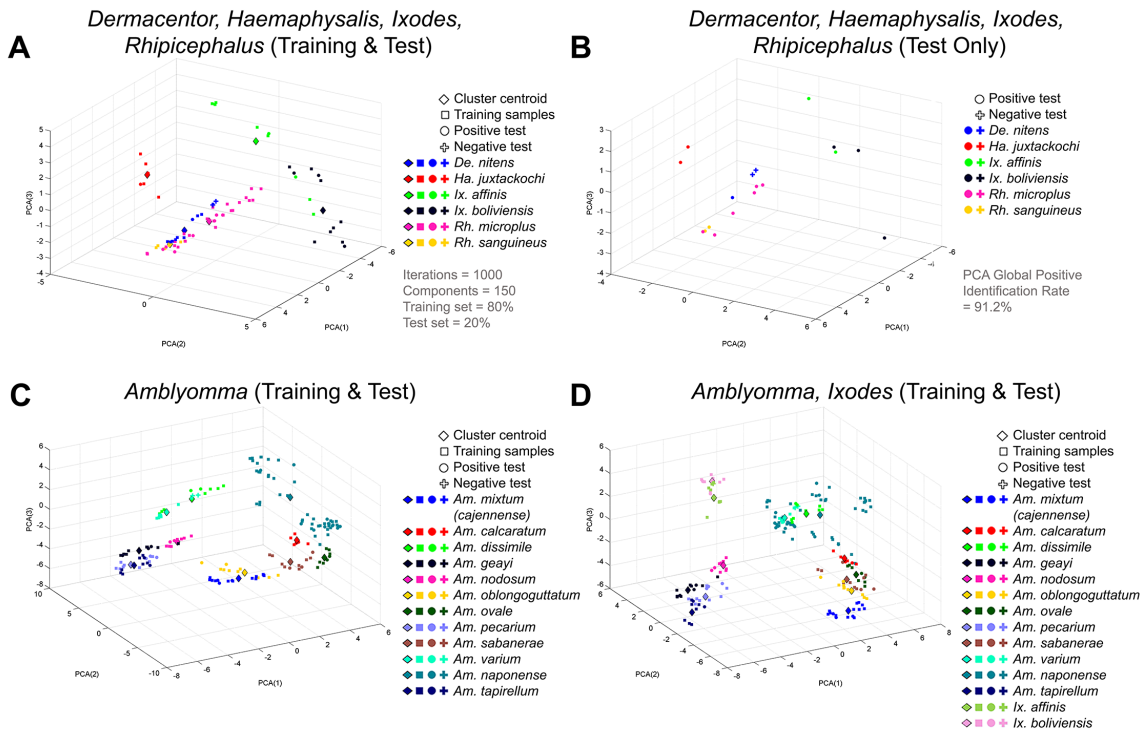

# Figure 4:

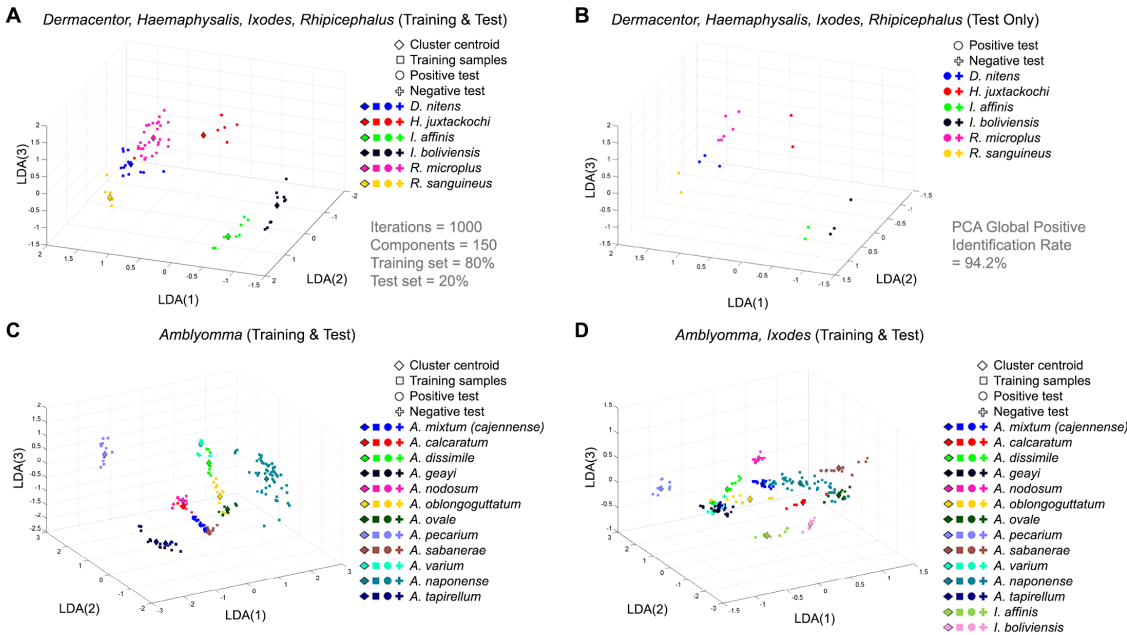

# Figure S1:

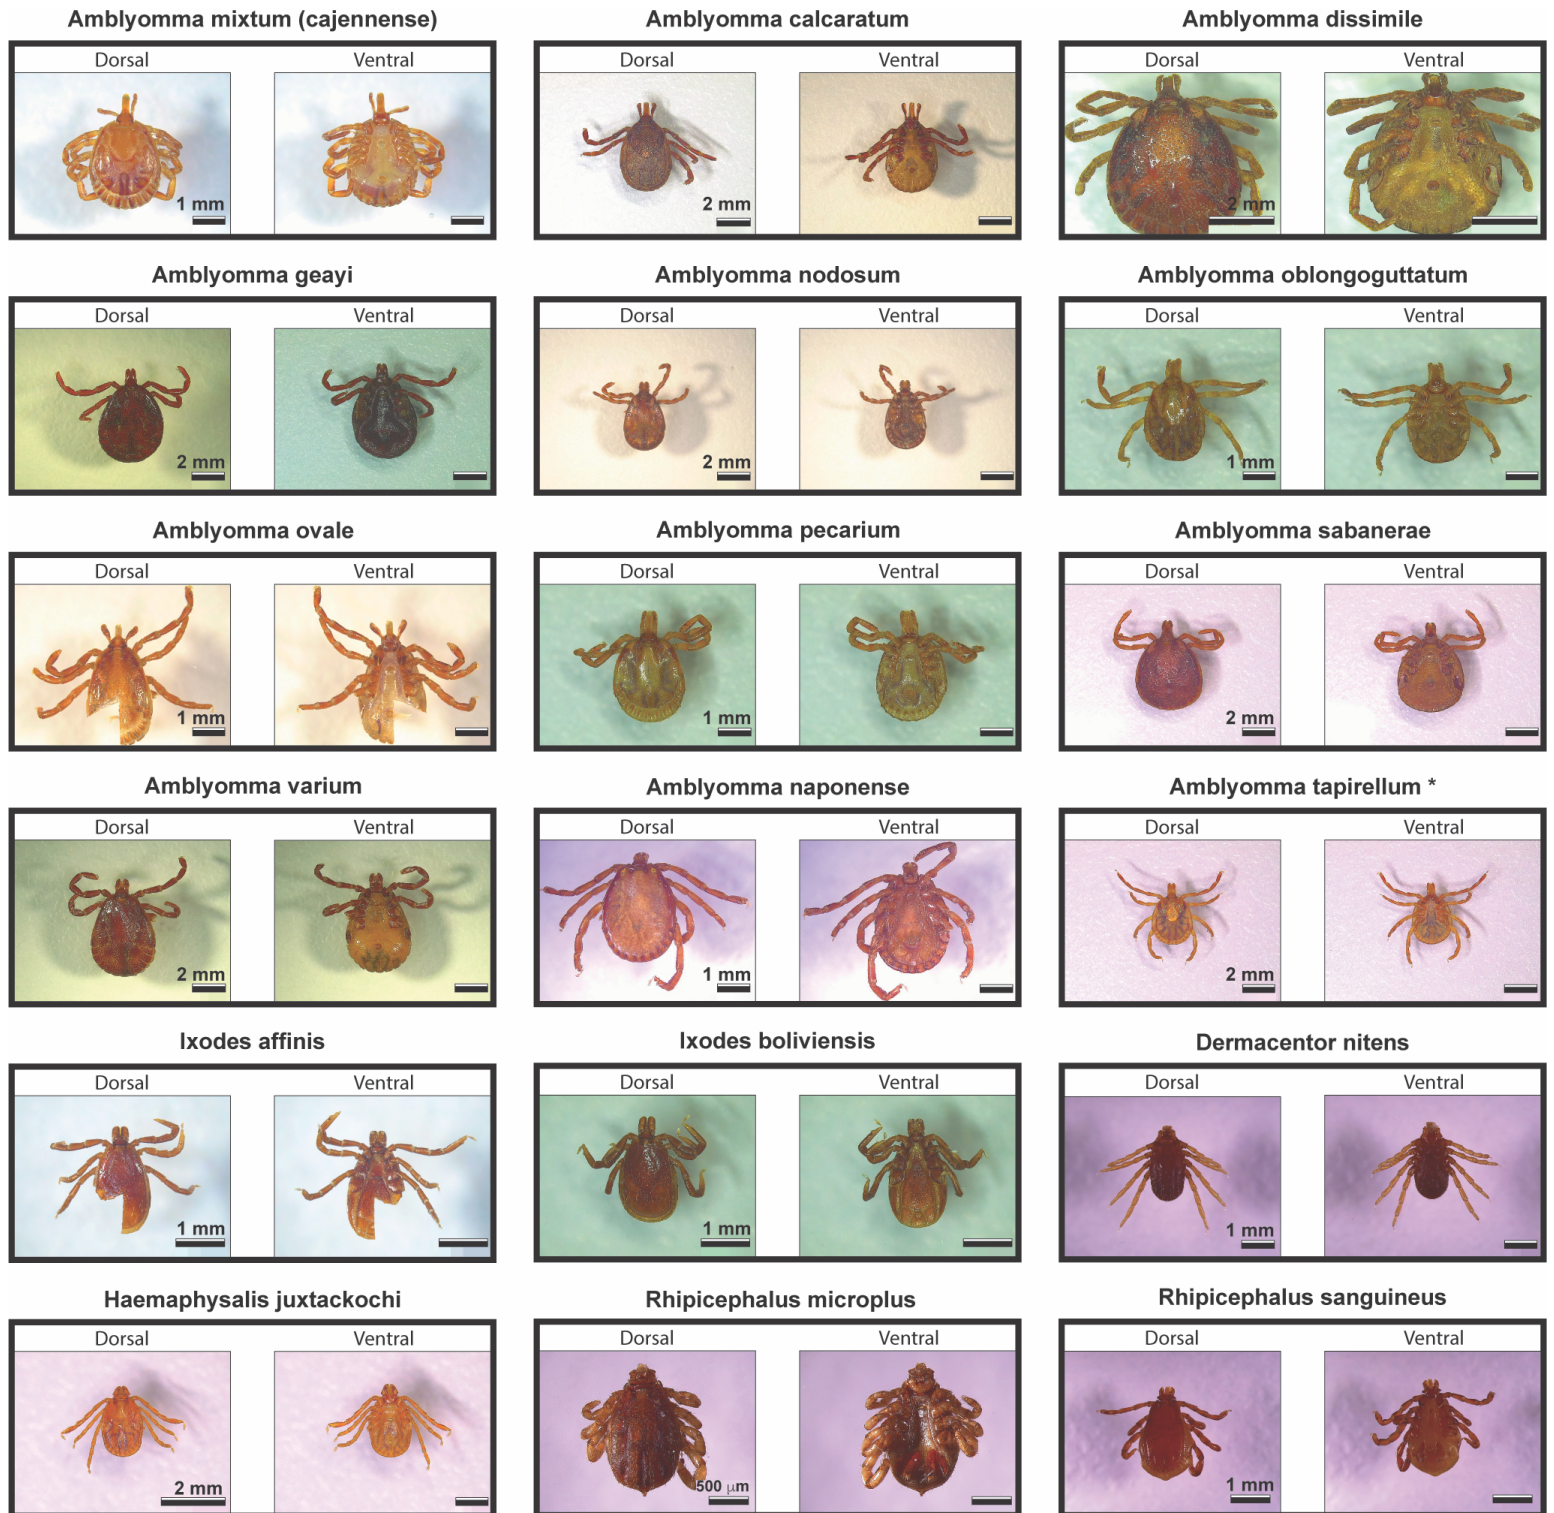

Source: https://www.biorxiv.org/content/biorxiv/early/2020/04/14/2020.04.13.040089.full.pdf
